# Supplementary material
Source: PubMed Central journal article supplement (PMC8009190)
Supplement: NIHMS1640104-supplement-1640104_Supp_Fig1-4.pdf [file NIHMS1640104-supplement-1640104_Supp_Fig1-4.pdf]

## Distribution of observed minus theoretical fragment mass

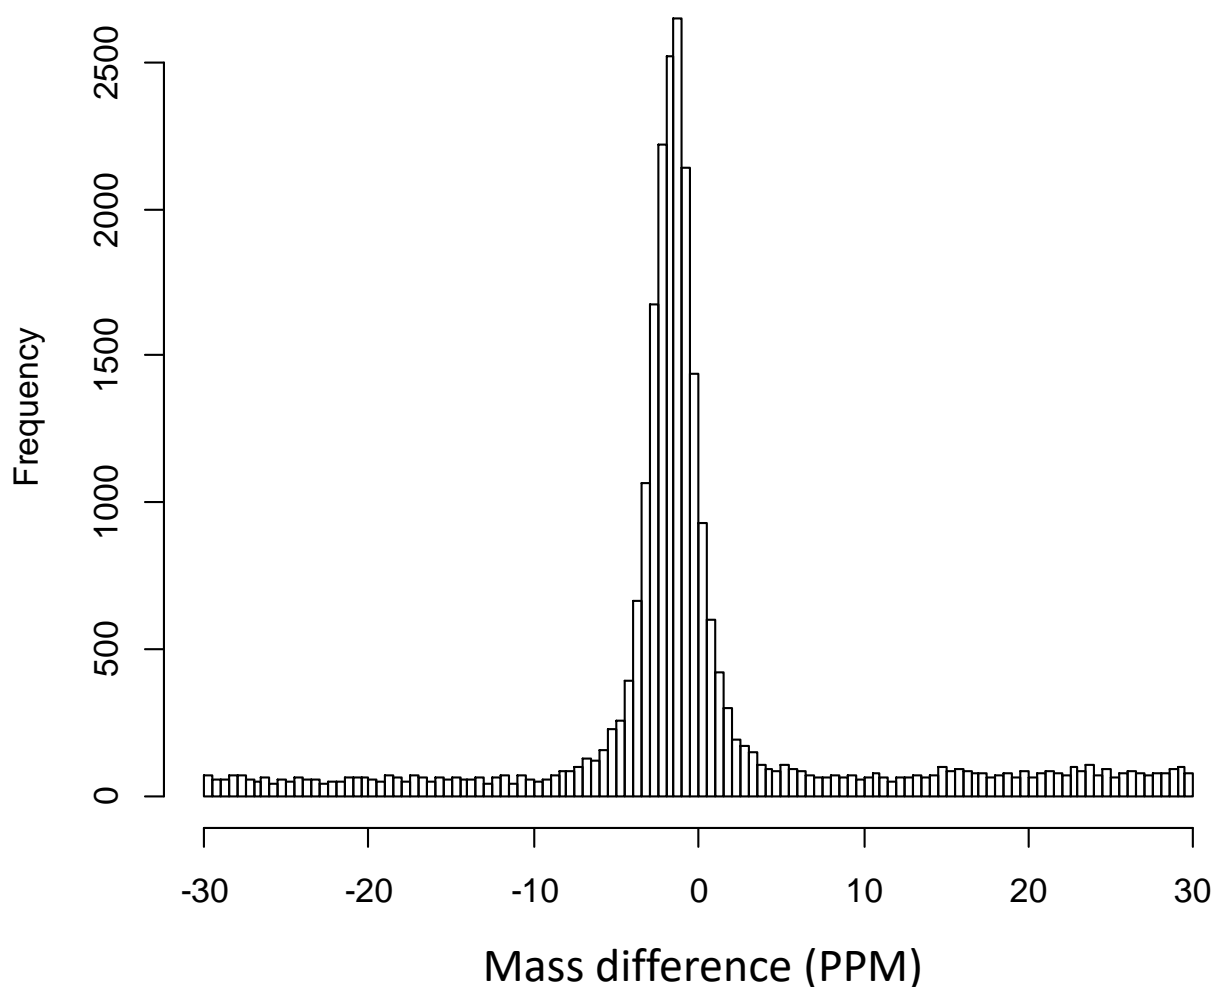

**Supplementary Figure 1: Distribution of fragment ion mass errors for all 1,423 peptides identified by DI-SPA analysis with the optimal scouting conditions.** Any fragment mass found 30 ppm of the predicted mass was included in this analysis. This shows that matched fragments are non-random, and that a fragment mass tolerance of 10ppm is appropriate for identification by MSPLIT-DIA.

**A**

DI-SPA-DIA: Overlap of 1,435 peptide IDs with MS1 features

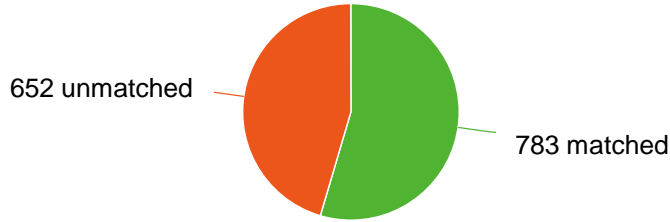**B**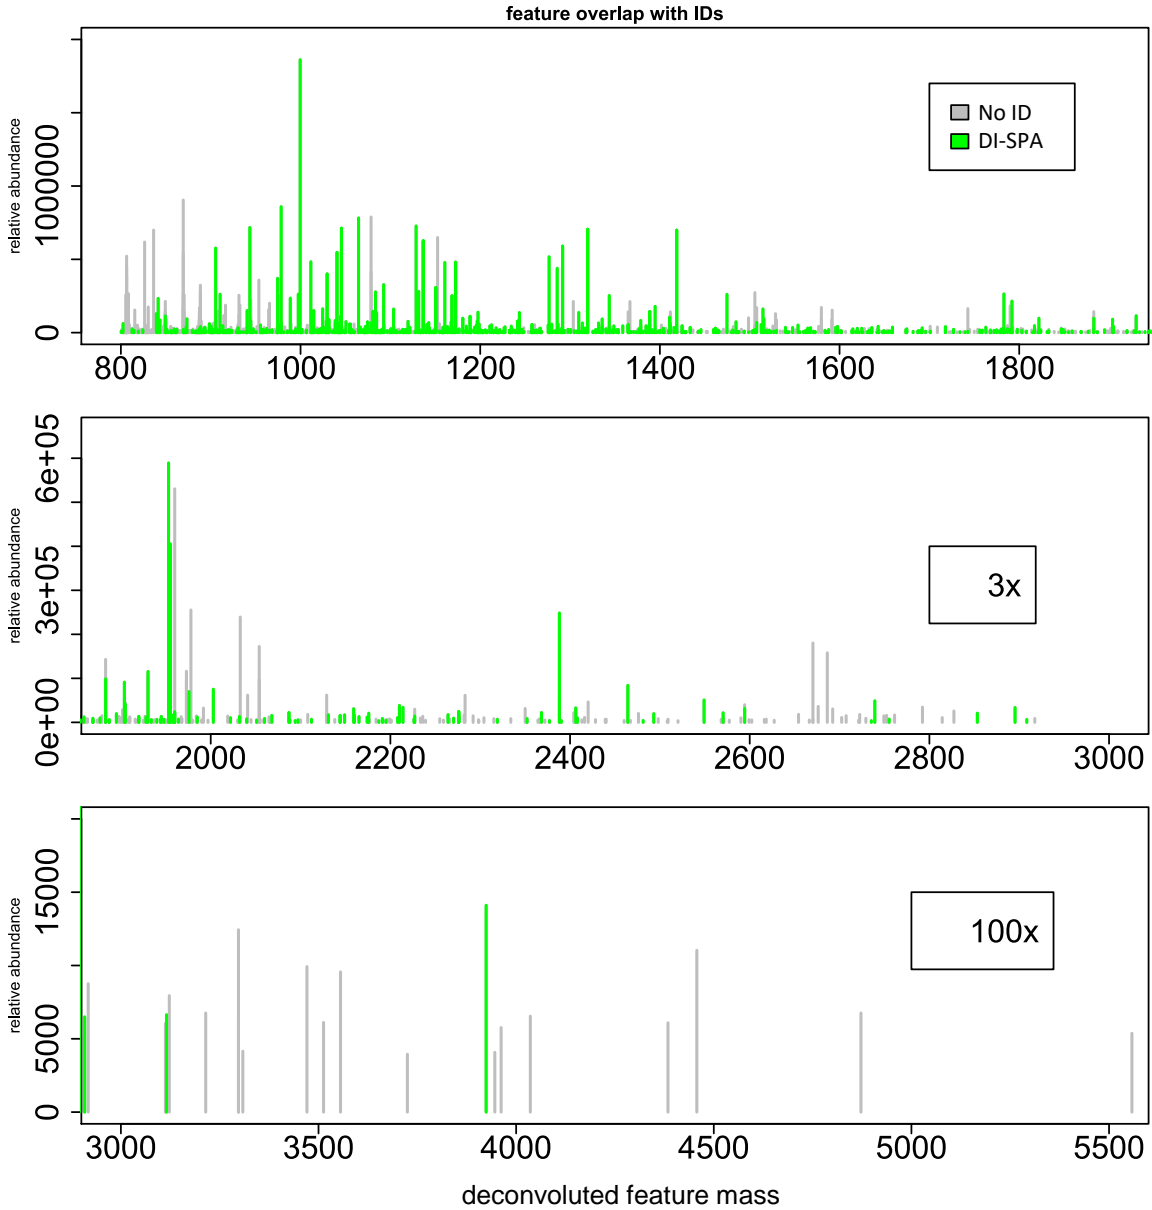

**Supplementary Figure 2: Overlap of precursor ion feature masses and identified peptide masses from DI-SPA.** Precursor ion (MS1) scans were performed from a range of 400-1,000  $m/z$  with FAIMS compensation voltages of -30, -40, -50, -60, -70, and -80. THRASH was used within DeconTools software to detect precursor mass features. Feature  $m/z$  values were converted to exact masses, and then matched to exact masses of peptides identified by DI-SPA analysis of the same sample. **A.** Portion of peptides identified by DI-SPA that match MS1 features. **B.** Overlay of MS1 feature masses detected from direct infusion with peptides identified by DI-SPA (where the second panel y-axis is zoomed 3x, and the third panel y-axis is zoomed 100x).

A

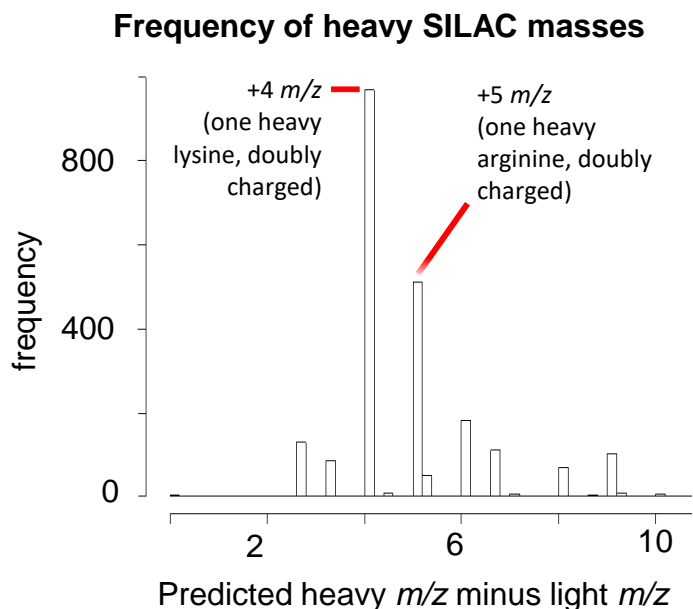

B

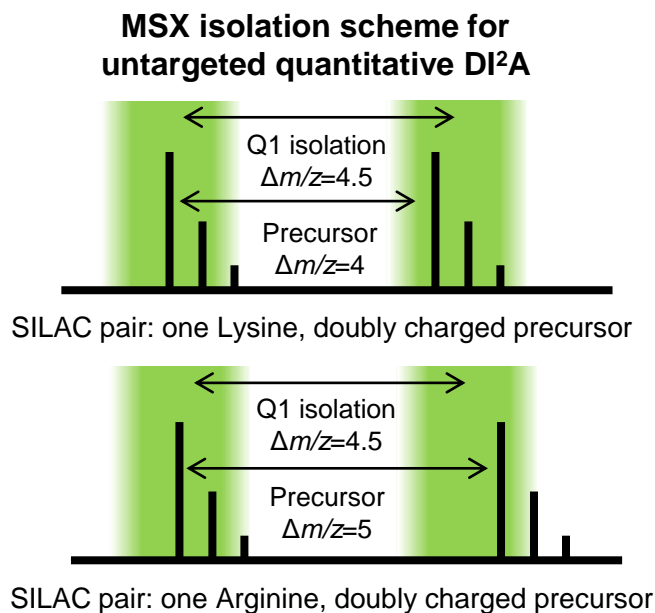

C

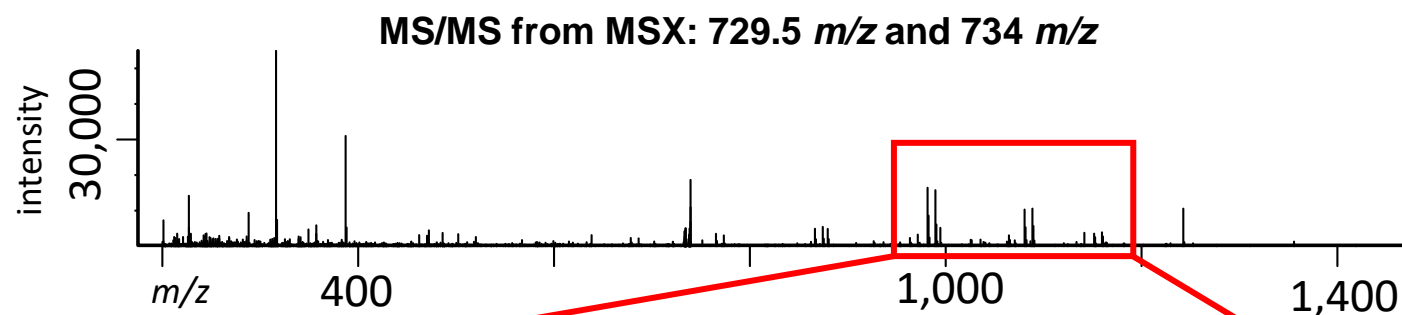

D

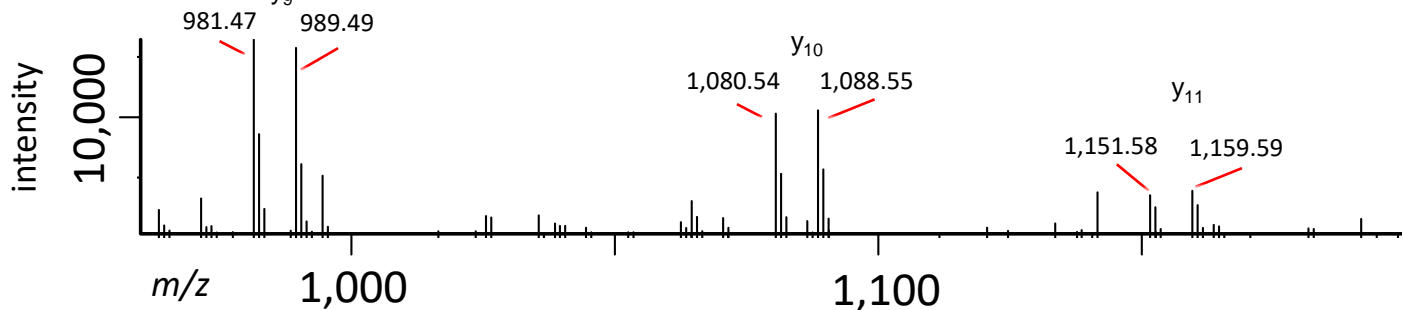

**Supplementary Figure 3: Untargeted DI-SPA quantification method for SILAC-labeled proteome samples.** (A) Histogram of the predicted heavy peptide  $m/z$  difference for all peptides identified from one A549 SILAC sample. (B) Depiction of the multiplexed ion isolation scheme used to collect unbiased quantitative data. Based on the most common heavy SILAC partners of +4 or +5  $m/z$  determined from (A), ion multiplexing (MSX) was used to co-isolate each possible light mass and the mass centered +4.5  $m/z$ . Both light and heavy masses were isolated with a width of 2  $m/z$ . (C) Example of SILAC quantification using an MS/MS spectra for the peptide “acetyl-SDAAVDTSSEITTK” from the 1:1 SILAC standard sample. (D) Close-up view of the high mass region from (C) showing the 1:1 ratio of light:heavy  $y_9$ ,  $y_{10}$ , and  $y_{11}$  ion pairs.

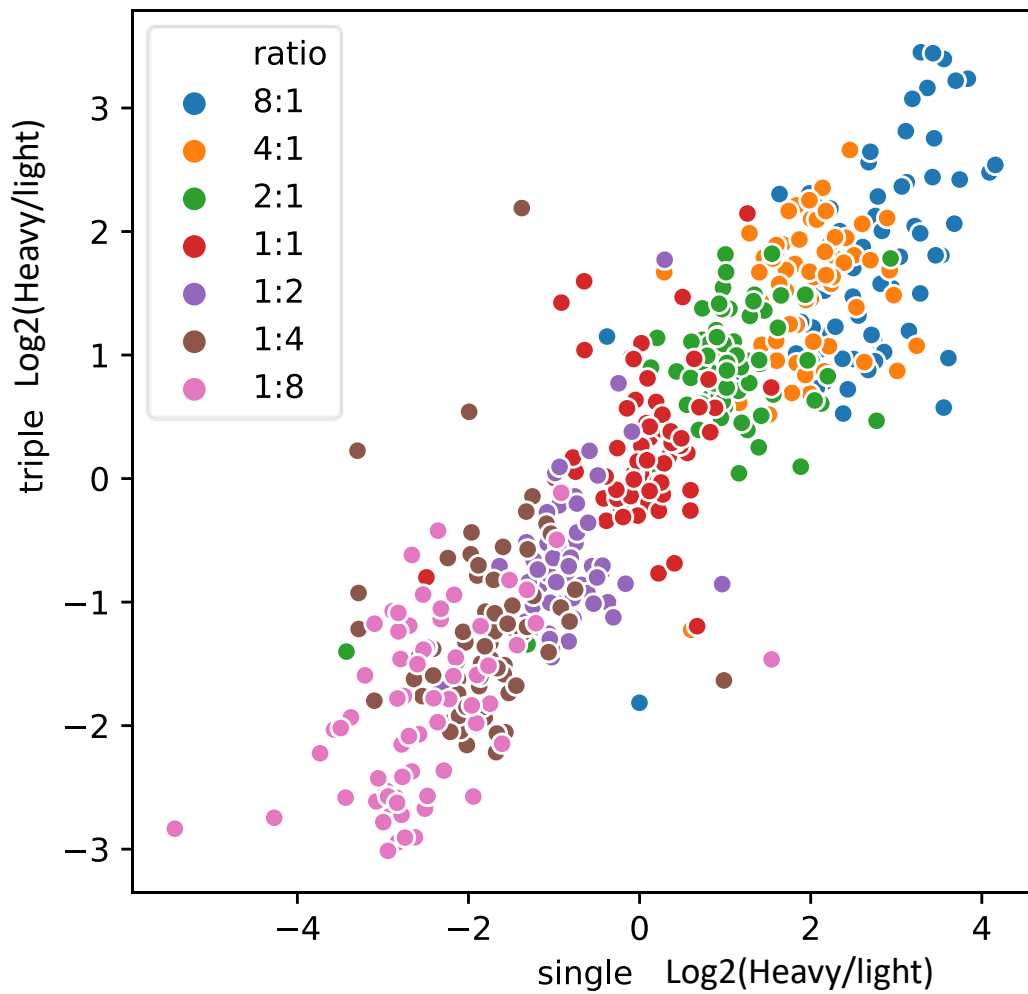

**Supplementary Figure 4: Correlation between observed SILAC ratios from single measurement or triple measurement DI-SPA analysis.** The same sample of peptides used in Figure 3 was used for this analysis. For triple ratio measurement, data collection was carried out targeting only the peptides found at FAIMS CV = -60V, and each heavy/light precursor pair was co-isolated three times during data collection. Heavy/light ratios were computed the same way as described for the single ratio analysis, but the 3 ratios were averaged. The ratios determined from single measurement (x-axis) are plotted against the ratios from triple measurement (y-axis), which shows good agreement between the different measurement strategies. The points are colored by the known Heavy/Light SILAC mixing ratio of the sample.
